# Supplementary material for: Tunable photoluminescence in a van der Waals heterojunction built from a MoS2monolayer and a PTCDA organic semiconductor
Source: Royal Society of Chemistry journal article supplement (doi:10.1039/c8nr03334j), 2018-01-01
Supplement: c8nr03334j1.pdf [file c8nr03334j1.pdf]

## Electronic Supporting Information (ESI)

### Tunable photoluminescence in van der Waals heterojunction built from MoS<sub>2</sub> monolayer and PTCDA organic semiconductor

Mohammad Rezwan Habib,<sup>a</sup> Hongfei Li,<sup>b</sup> Yuhang Kong,<sup>b</sup> Tao Liang,<sup>b</sup>  
Sk. Md. Obaidulla,<sup>a</sup> Shuang Xie,<sup>c</sup> Shengping Wang,<sup>c</sup> Xiangyang Ma,<sup>c</sup> Huanxing Su<sup>\*d</sup>  
and Mingsheng Xu<sup>\*a</sup>

<sup>a</sup> State Key Laboratory of Silicon Materials, College of Information Science &  
Electronic Engineering, Zhejiang University, Hangzhou 310027, P. R. China.

<sup>b</sup> Department of Polymer Science and Engineering, Zhejiang University, Hangzhou  
310027, P. R. China.

<sup>c</sup> State Key Laboratory of Silicon Materials, School of Materials Science and  
Engineering, Zhejiang University, Hangzhou 310027, P. R. China

<sup>d</sup> State Key Laboratory of Quality Research in Chinese Medicine and Institute of  
Chinese Medical Sciences, University of Macau, Macau SAR, P. R. China.

\* msxu@zju.edu.cn, huanxingsu@umac.mo

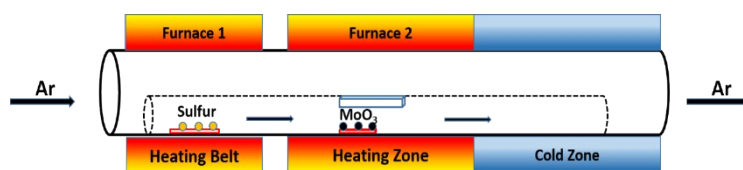

**Figure S1.** Schematic illustration of the CVD system for MoS<sub>2</sub> synthesis.

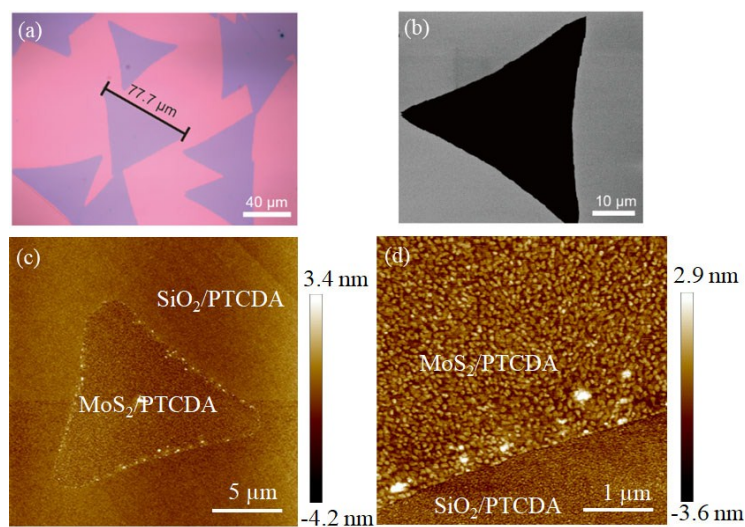

**Figure S2.** Structural characterization of monolayer MoS<sub>2</sub> synthesized by CVD. (a) An optical microscope image of MoS<sub>2</sub> sheets on Si/SiO<sub>2</sub>. (b) SEM image of MoS<sub>2</sub> on Si/SiO<sub>2</sub>. (c) and (d) AFM topographic images of PTCDA on MoS<sub>2</sub> sheets as well as on bare SiO<sub>2</sub>.

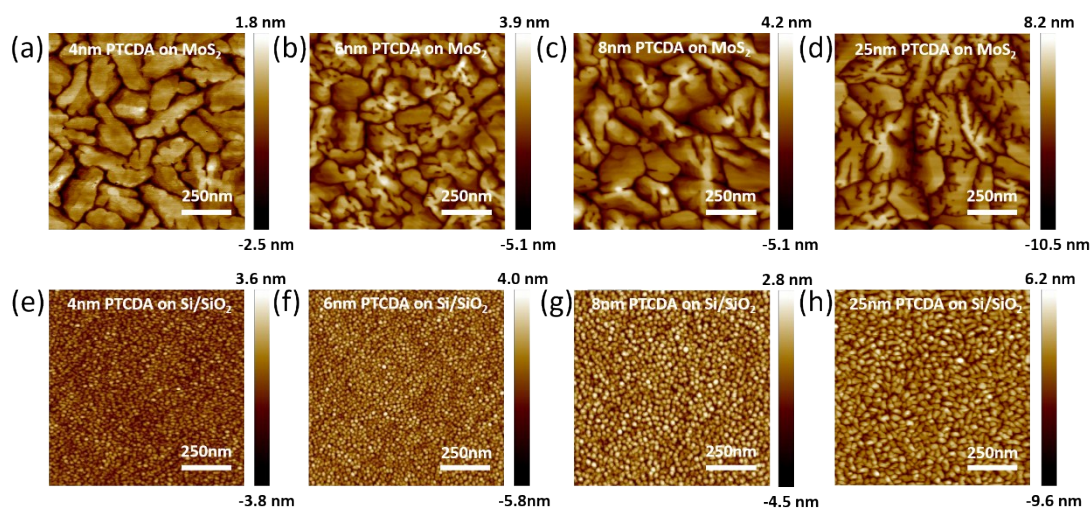

**Figure S3.** Morphological comparison of PTCDA films with different thickness (4 nm, 6 nm, 8 nm, and 25 nm) on MoS<sub>2</sub> (a-d) and Si/SiO<sub>2</sub> surfaces (e-h).

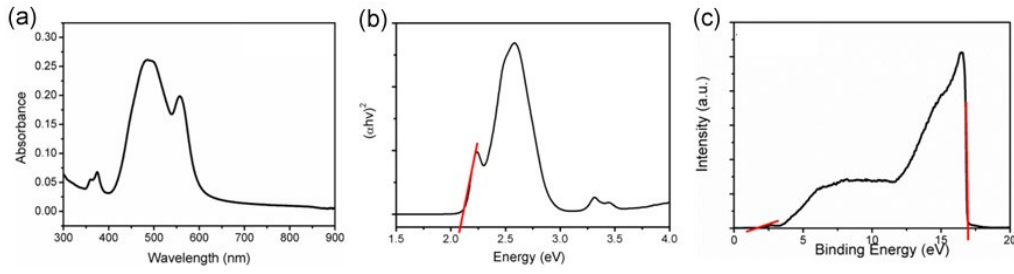

**Figure S4.** (a) UV-vis absorbance spectrum of PTCDA film. (b) Plot of  $(\alpha h\nu)^2$  as a function of energy based on  $\alpha h\nu = C(h\nu - E_g)^{1/2}$  according to (a). (c) Ultraviolet photoelectron spectroscopy (UPS) spectrum of the PTCDA film.

To estimate the optical bandgap of PTCDA film, we replotted the UV-vis absorption spectrum of the PTCDA film by using the Tauc equation<sup>[S1]</sup> of  $\alpha h\nu = C(h\nu - E_g)^{1/2}$ , where  $\alpha$ ,  $h$ ,  $\nu$ ,  $C$ , and  $E_g$  are the absorption coefficient, Planck's constant, the incident light frequency, proportionality constant, and the band-gap energy, respectively. Thus, band-gap energy (~2.1 eV) of the PTCDA film can be thus estimated from a plot of  $(\alpha h\nu)^2$  versus the photon energy ( $h\nu$ ), where in the graph the intercept is the band gap as shown by the red straight line.

Based on the UPS result in Figure S3c, the HOMO level of the PTCDA film is determined<sup>[S2,S3]</sup> to be about 6.73 eV. That is, the two red lines are the tangents to the curve, which show the position of the Fermi and the cut-off edge. From the UPS image, we can get the  $E_{\text{Fermi}}$  is around at 2.43 eV and the  $E_{\text{cut-off}}$  is around at 16.92 eV. So we can calculate the  $E_{\text{HOMO}}$  by using the formula  $E_{\text{HOMO}} = 21.22 - (16.92 - 2.43) = 6.73$  eV. Combining UV-Vis measurements to measure or calculate band gap of PTCDA film and UPS measurements of the HOMO, the LUMO of PTCDA film can be determined at about 4.62 eV and the band structure diagram can be easily drawn.

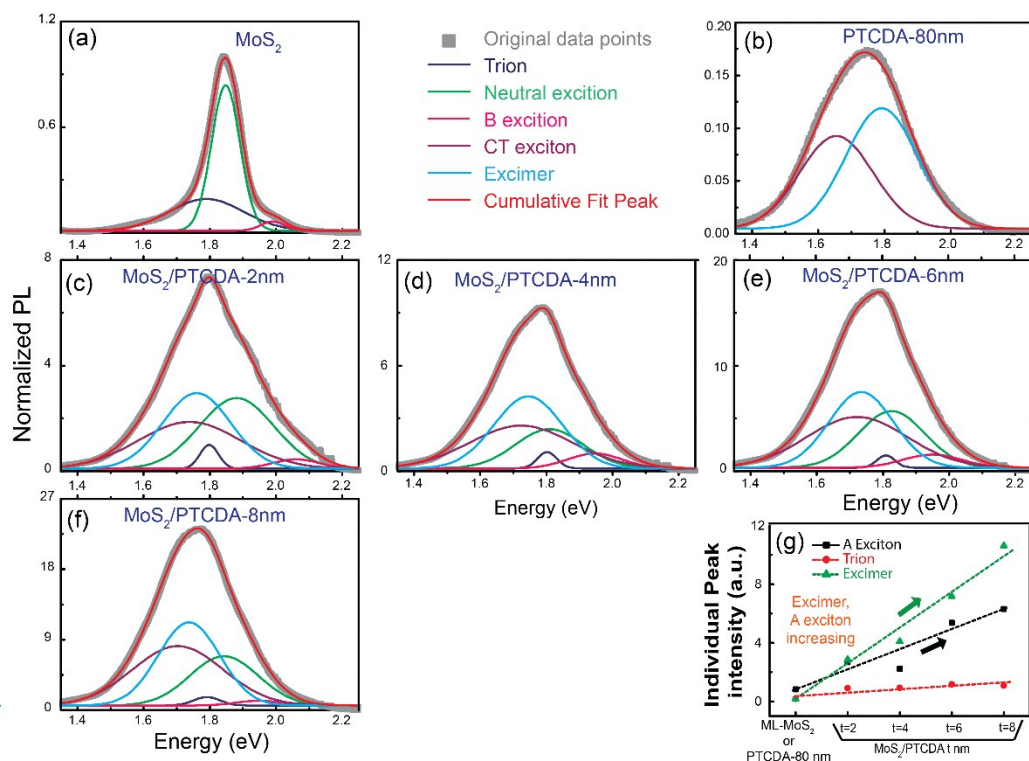

**Figure S5.** PL peak deconvolution. Normalized PL spectra of (a) monolayer  $\text{MoS}_2$  and (b) 80 nm PTCDA film on  $\text{SiO}_2/\text{Si}$  substrate and (c-f) PL spectra of 2 nm, 4 nm, 6 nm, and 8 nm PTCDA film on  $\text{MoS}_2$ . The grey thick curves represent the corresponding experimental results and the red lines are the fitted. Normalization of all PL spectra has been done with respect to the PL spectra of monolayer  $\text{MoS}_2$  to show the contribution of individual PL peaks to total intensity compare to ML  $\text{MoS}_2$ . The PL peak could be deconvoluted into five components due to A exciton or neutral exciton (green), B exciton (pink), A<sup>-</sup> trion (blue), CT exciton (purple) and excimer (cyan). A, B and A<sup>-</sup> are PL emission channels of  $\text{MoS}_2$  and CT, excimer emission channels for PTCDA films. (g) Peak intensity of A exciton and excimer are increased in  $\text{MoS}_2/\text{PTCDA}$  heterostructure compare to ML- $\text{MoS}_2$ .

Kobitski *et al.* <sup>[S4]</sup> reported that at room temperatures, PL channels of PTCDA such as Frenkel and S band are quenched due to activated nonradiative decay mechanisms, and the CT exciton and excimer PL become the important radiative recombination channels because the influence of nonradiative processes on the recombination rate is much weaker than for the other PL bands.

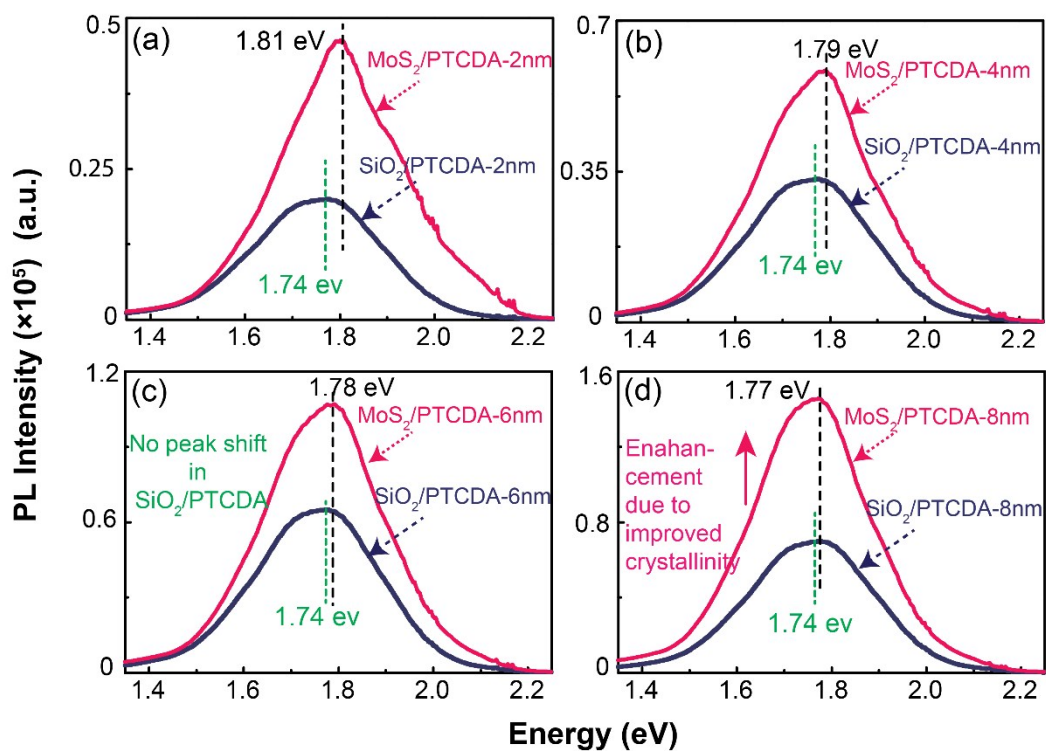

**Figure S6:** Comparison of PL of PTCDA film of different thickness 2nm (a), 4 nm (b), 6nm (c), and 8nm (d) on both MoS<sub>2</sub> and SiO<sub>2</sub>.

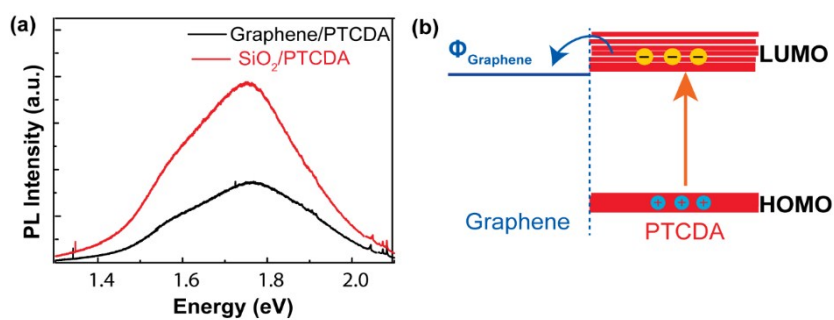

**Figure S7.** (a) PL quenching of PTCDA on graphene, (b) Energy level diagram of graphene and PTCDA.

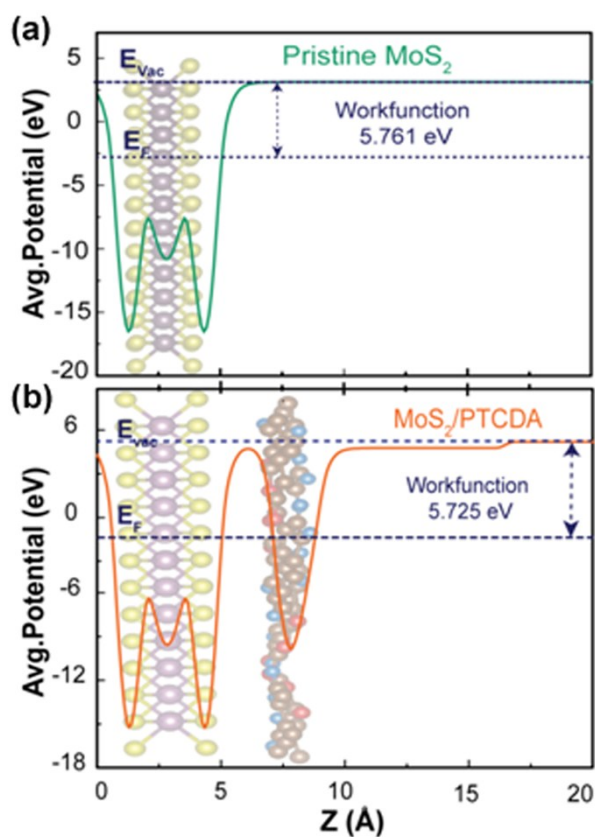

**Figure S8.** Plane averaged electrostatic potential calculation to show the possibility of interfacial charge transfer. (a) Plane averaged electrostatic potential of MoS<sub>2</sub>. (b) Plane averaged electrostatic potential of MoS<sub>2</sub>/PTCDA heterostructure.  $E_{vac}$  and  $E_F$  represent the vacuum level and Fermi level, respectively. Workfunctions, difference between vacuum level and Fermi level, of the pristine monolayer MoS<sub>2</sub> and MoS<sub>2</sub>/PTCDA heterostructure are 5.761 eV and 5.725 eV, respectively. Side view of pristine MoS<sub>2</sub> and MoS<sub>2</sub>/PTCDA heterostructure are shown in the background of (a) and (b), respectively.



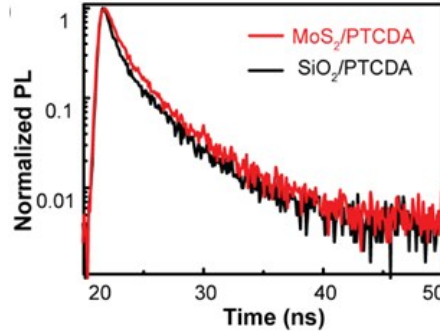

**Figure S9.** Time-resolved PL spectra of the PTCDA film on Si/SiO<sub>2</sub> substrate and MoS<sub>2</sub>.

The decay transients can be fitted using a biexponential decay function expressed as follows [S5,S6]:

$$I(t) = A_1 \exp(-t/\tau_1) + A_2 \exp(-t/\tau_2)$$

where  $A_1$  and  $A_2$  are the amplitudes (or weighting factors), and  $\tau_1$  and  $\tau_2$  are the corresponding lifetimes.

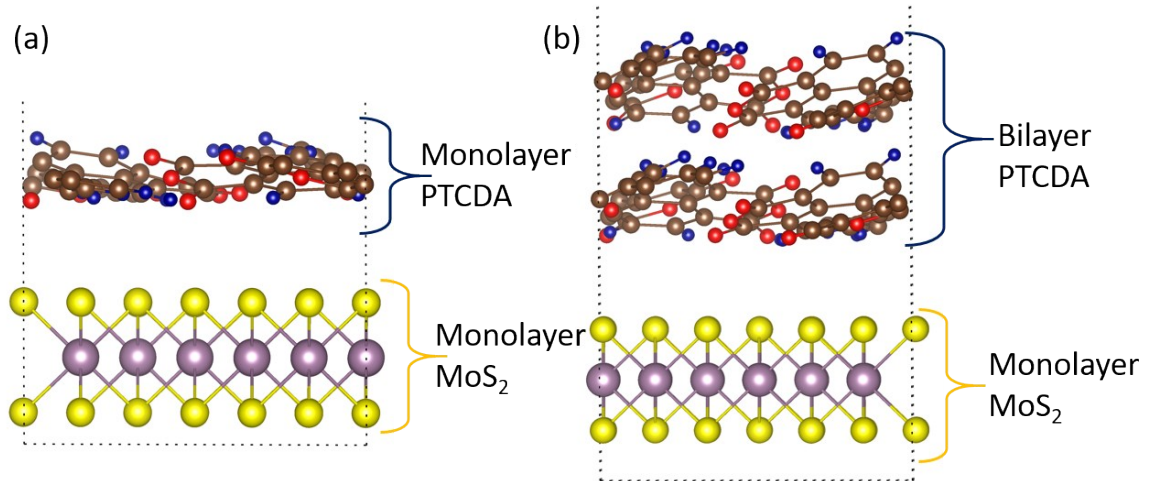

**Fig. S10:** Optimized structure of monolayer (a) and bilayer PTCDA (b) on monolayer MoS<sub>2</sub>.

### Explanation of Raman peak shift related to interaction between the MoS<sub>2</sub>/PTCDA

The shift observed in MoS<sub>2</sub>/PTCDA heterostructure can be attributed to the interlayer interaction between MoS<sub>2</sub> and PTCDA layer. The shifting of A<sub>1g</sub> peak (out of plane vibration) has similar explanation with the layer-dependent Raman shift in MoS<sub>2</sub>.<sup>[S7]</sup> The position of a phonon with momentum  $\mathbf{q}$  and pos ( $\mathbf{q}$ ) in condensed material can be written as:

$$\left| (1/\sqrt{M_m M_n}) \sum C_{m\alpha, n\beta}(\mathbf{q}) - \text{pos}^2(\mathbf{q}) \right| = 0 \quad (1)$$

where  $M_m$  and  $M_n$  are the mass of  $m^{\text{th}}$  and  $n^{\text{th}}$  atoms, respectively, involved in the vibration and  $C_{m\alpha, n\beta}(\mathbf{q})$  corresponds to real space atomic force constant matrix.  $\alpha$  and  $\beta$  represent the direction of the vibration of atoms  $m$  and  $n$ , respectively. The interlayer interaction term of MoS<sub>2</sub> (for bilayer, trilayer and so on) is represented by matrix element  $C_{S_z S_z'}$ . Zhou *et al.*<sup>[S2]</sup> modelled this interaction term by a spring which connect two sulfur atoms. So for bare monolayer MoS<sub>2</sub> the phonon position of A<sub>1g</sub> peak is equal to  $[1/M_s(C_{S_z, S_z})]^{1/2}$ . The introduction of PTCDA layer on MoS<sub>2</sub> introduces an additional term ( $C_{S_z, C_z'}$ ) due to the interaction between the MoS<sub>2</sub> and PTCDA layer (confirmed by projected density of state). This additional term increases the phonon position of A<sub>1g</sub> up to  $[1/M_s(C_{S_z, S_z} + C_{S_z, C_z'})]^{1/2}$  and shifted to higher wavenumber compare to monolayer MoS<sub>2</sub>. The blue shifting for the 6 nm and 8 nm PTCDA film-based MoS<sub>2</sub>/PTCDA heterostructures are less compared to the 2 nm and 4 nm (similar trend for thicker MoS<sub>2</sub> film i.e. for 5L and 6L MoS<sub>2</sub> A<sub>1g</sub> peak shift is less compared to 2L and 3L MoS<sub>2</sub>) can be explained by the competition between the vdW interaction of MoS<sub>2</sub> and PTCDA layer and intermolecular interaction of PTCDA layers which confirmed by layer dependent binding energy of PTCDA on MoS<sub>2</sub> (see in the main text). For higher PTCDA thickness the vdW interaction between MoS<sub>2</sub> and PTCDA layer is suppressed by the intermolecular interaction of PTCDA. This also explain the observation of the enhancement of the PL intensity with negligible peak shift of the MoS<sub>2</sub>/PTCDA when the PTCDA film was thick enough.

[S1] J. Tauc, in: Amorphous and Liquid Semiconductors, Plenum, 1974, p. 159.

[S2] Seki, et al. Trans. on Electron Dev. 1997, 44, 1295.

[S3] Handbook of x-ray and ultraviolet photoelectron spectroscopy, edited by D. Briggs, Heyden&Son Ltd, 1977.

[S4] A. Y. Kobitski, R. Scholz, D. R. T. Zahn, H. P. Wagner, *Phys. Rev. B* 2003, 68, 155201.



- [S5] X. Liu, Q. Zhang, G. Xing, Q. Xiong, and T. C. Sum, *J. Phys. Chem. C* 2013, 117, 10716.
- [S6] C.Y. Luan, S. Xie, C. Y. Ma, S. P. Wang, Y. H. Kong, M. S. Xu, *Appl. Phys. Lett.* 2017, 111, 073105.
- [S7] K. G. Zhou, F. Withers, Y. Cao, S. Hu, G. L. Yu, C. Casiraghi, *ACS Nano* 2014, 8, 9914.
